# Supplementary material for: Characterisation of enterovirus RNA detected in the pancreas and other specimens of live patients with newly diagnosed type 1 diabetes in the DiViD study
Source: PubMed Central journal article supplement (PMC8494699; doi:10.1007/s00125-021-05525-0), 2021-08-14
Supplement: 125_2021_5525_MOESM1_ESM.pdf [file 125_2021_5525_MOESM1_ESM.pdf]

| RECOMMENDED INFORMATION                                                           |                                                                          |                                                                          |                                                                          |                                                                          |                                                                          |                                                                          |  |  |
|-----------------------------------------------------------------------------------|--------------------------------------------------------------------------|--------------------------------------------------------------------------|--------------------------------------------------------------------------|--------------------------------------------------------------------------|--------------------------------------------------------------------------|--------------------------------------------------------------------------|--|--|
| Donor cause of death                                                              |                                                                          |                                                                          |                                                                          |                                                                          |                                                                          |                                                                          |  |  |
| Warm ischaemia time (h)                                                           |                                                                          |                                                                          |                                                                          |                                                                          |                                                                          |                                                                          |  |  |
| Cold ischaemia time (h)                                                           |                                                                          |                                                                          |                                                                          |                                                                          |                                                                          |                                                                          |  |  |
| Estimated purity (%)                                                              |                                                                          |                                                                          |                                                                          |                                                                          |                                                                          |                                                                          |  |  |
| Estimated viability (%)                                                           |                                                                          |                                                                          |                                                                          |                                                                          |                                                                          |                                                                          |  |  |
| Total culture time (h) <sup>d</sup>                                               |                                                                          |                                                                          |                                                                          |                                                                          |                                                                          |                                                                          |  |  |
| Glucose-stimulated insulin secretion or other functional measurement <sup>e</sup> |                                                                          |                                                                          |                                                                          |                                                                          |                                                                          |                                                                          |  |  |
| Handpicked to purity?<br>Please select yes/no from drop down list                 |                                                                          |                                                                          |                                                                          |                                                                          |                                                                          |                                                                          |  |  |
| Additional notes                                                                  | The islet were isolated from living patients with T1D in the DiViD study | The islet were isolated from living patients with T1D in the DiViD study | The islet were isolated from living patients with T1D in the DiViD study | The islet were isolated from living patients with T1D in the DiViD study | The islet were isolated from living patients with T1D in the DiViD study | The islet were isolated from living patients with T1D in the DiViD study |  |  |

<sup>a</sup>If you have used more than eight islet preparations, please complete additional forms as necessary

<sup>b</sup>For example, IIDP, ECIT, Alberta IsletCore

<sup>c</sup>Please specify the therapy/therapies

<sup>d</sup>Time of islet culture at the isolation centre, during shipment and at the receiving laboratory

<sup>e</sup>Please specify the test and the results
